# Supplementary material
Source: publisher figshare collection journal article supplement (https://acs.figshare.com/ndownloader/files/4630084)

# SUPPORTING INFORMATION

## Aplysamine 6, an Alkaloidal Inhibitor of Isoprenylcysteine Carboxyl Methyltransferase from the sponge *Pseudoceratina* sp.

*Malcolm S. Buchanan,<sup>†</sup> Anthony R. Carroll,<sup>†</sup> Gregory A. Fechner,<sup>†</sup> Anthony Boyle,<sup>†</sup> Moana Simpson,<sup>†</sup>  
Rama Addepalli,<sup>†</sup> Vicky M. Avery,<sup>†</sup> John N. A. Hooper,<sup>‡</sup> Tony Cheung,<sup>§</sup> Huwei Chen,<sup>§</sup> and Ronald J.  
Quinn<sup>†,\*</sup>*

Eskitis Institute, Griffith University, Brisbane, Queensland 4111, Australia, Queensland Centre for  
Biodiversity, Queensland Museum, South Brisbane, Queensland 4101, Australia, and AstraZeneca R &  
D Boston, 35 Gatehouse Drive, Waltham, Massachusetts 02451, USA

### List of Supporting Information

| Contents                        | Page |
|---------------------------------|------|
| Figure S1. Photograph of sponge | S2   |

**Figure S1. Photograph of sponge**

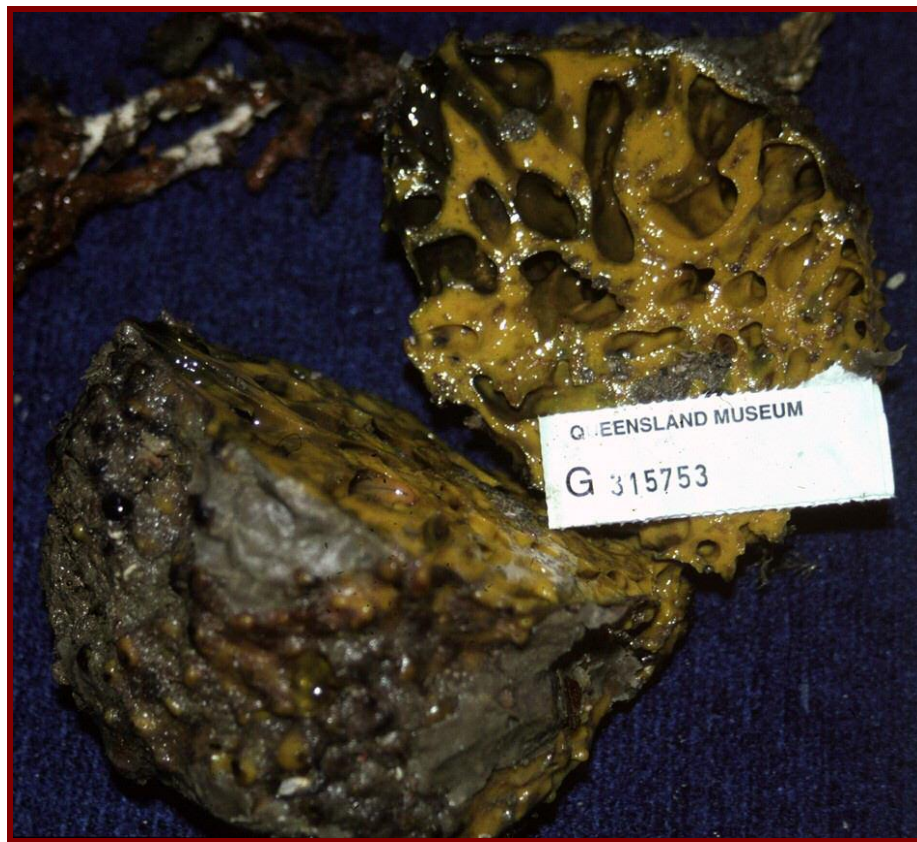

Supplement: Supplementary file 1 [file 4630084]
